# Supplementary material for: Plasma-derived extracellular vesicles from Plasmodium vivax patients signal spleen fibroblasts via NF-kB facilitating parasite cytoadherence
Source: PubMed Central journal article supplement (PMC7265481; doi:10.1038/s41467-020-16337-y), 2020-06-02
Supplement: 41467_2020_16337_MOESM1_ESM.pdf [file 41467_2020_16337_MOESM1_ESM.pdf]

**Supplementary Information**

**Plasma-derived extracellular vesicles from *Plasmodium vivax* patients  
signal spleen fibroblasts via NF- $\kappa$ B facilitating parasite cytoadherence**

**Haruka et al.**

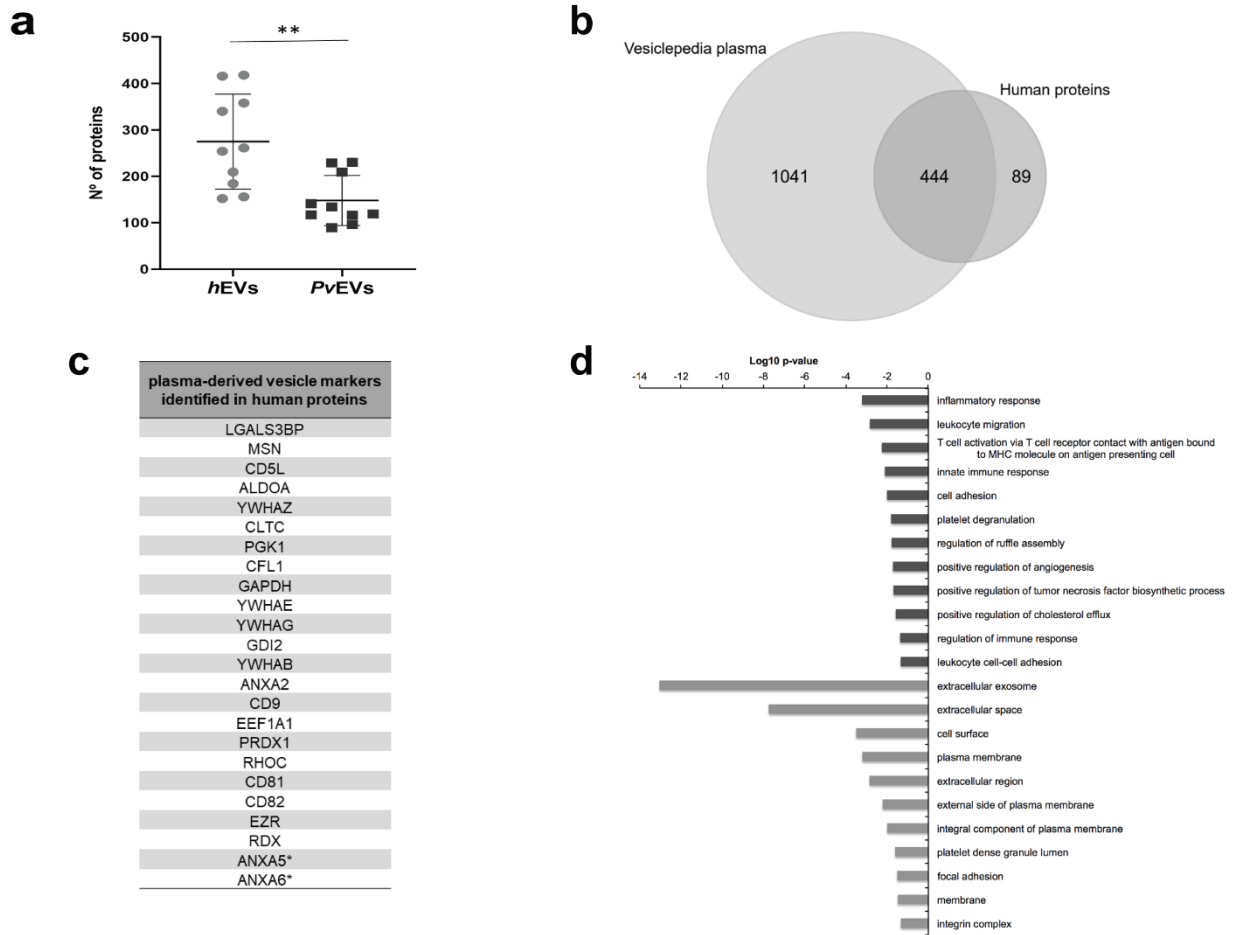

**Supplementary Figure 1. Proteomic characterization of the human component of *PvEVs* and *hEVs*.** (a) Comparison of total number of human proteins identified in healthy donors and *P. vivax* patients ( $n = 10$ , biologically independent samples). Data show mean  $\pm$  SD. Two-sided, Mann-Whitney test,  $**p = 0.0023$  (GraphPad). Source data are provided as a Source Data file. (b) Venn diagram comparison of the 533 human proteins identified in *PvEVs* and *hEVs* with the plasma proteins compiled in the public repository of EV cargo Vesiclepedia<sup>40</sup>. 444 proteins were detected in the intersection. (c) Plasma-derived EVs markers detected among the human proteins identified in *PvEVs* and *hEVs*. Two proteins exclusively present in healthy donors are highlighted (\*). (d) Gene ontology (GO)-enrichment analysis of the 33 proteins exclusively associated to *PvEVs*. Bar plot shows the more significant GO terms on the category Biological process (black bars) and Cellular component (gray bars). Source data are provided as a Source Data file and Supplementary Data 2, 3, and 4.

**a**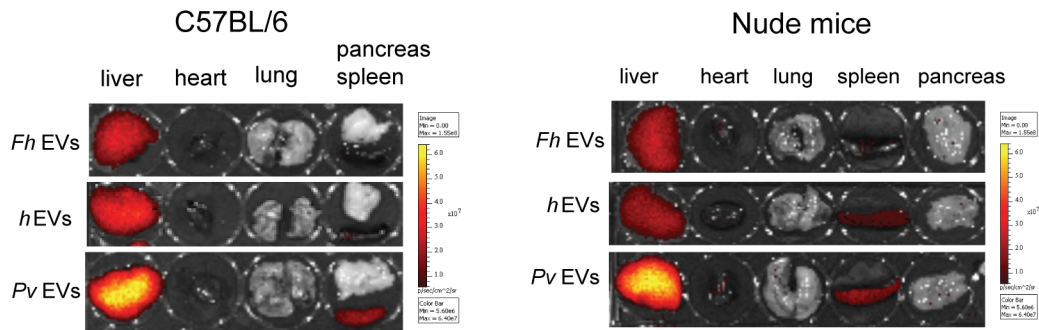**b**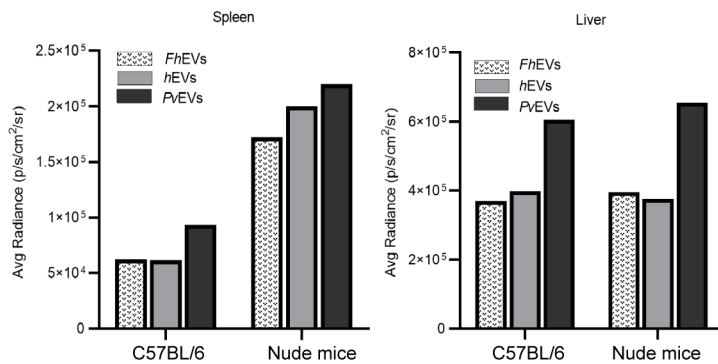**c**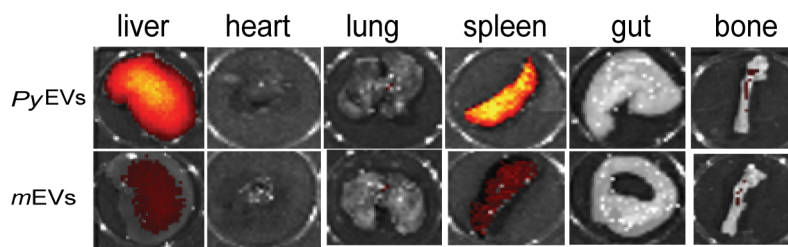

**Supplementary Figure 2. *In vivo* distribution of EVs in mice injected with labelled EVs.** (a) Representative IVIS-Spectrum images of the *in vivo* distribution of pooled EVs from *P. vivax* patients (PvEVs), healthy human volunteers (hEVs), and *Fasciola hepatica* (FhEVs), after injection into C57BL/6 mice (left) and in nude mice (right) ( $n = 1$ ). After 1h, mice were sacrificed to analyze different organs as indicated. (b) Quantification of EVs in liver and spleen. Source data are provided as a Source Data file. (c) Reticulocyte-derived EVs from mice infected with *P. yoelii*-infected (PyEVs) and plasma-derived EVs from healthy mice (mEVs) were injected via the retro-orbital venous sinus into C57BL/6 mice ( $n = 3$ ). After 1 h, mice were sacrificed and organs were harvested for the analysis. The images of each organ were captured by IVIS-SPECTRUM imaging system (PerkinElmer).

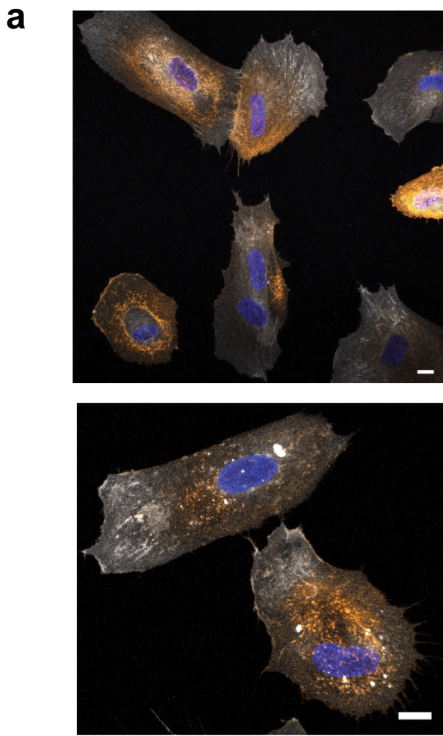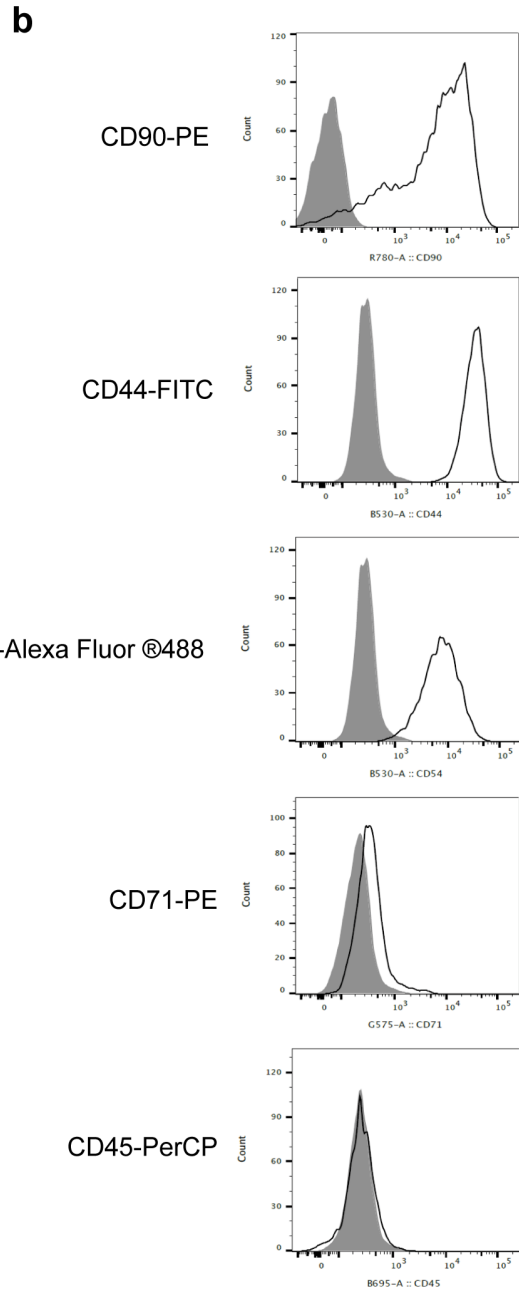

**Supplementary Figure 3. Characterization of human spleen fibroblasts (*hSFs*). (a) Confocal images of *hSFs*. Nuclei were stained with Hoechst® 33342 (blue), cell membranes with Cell Mask™ (white) and ICAM-1 with Alexa 488-conjugated ICAM-1 (orange) with a 40x/NA1.30 (upper) and 63x/NA1.40 (lower) oil-immersion objectives. Scale bar: 10µm. Image representative of three independent experiments. (b) Expression of the indicated molecules in *hSFs* measured by LSR-Fortessa cytometer. The background staining (gray histograms) are shown in each histogram.**

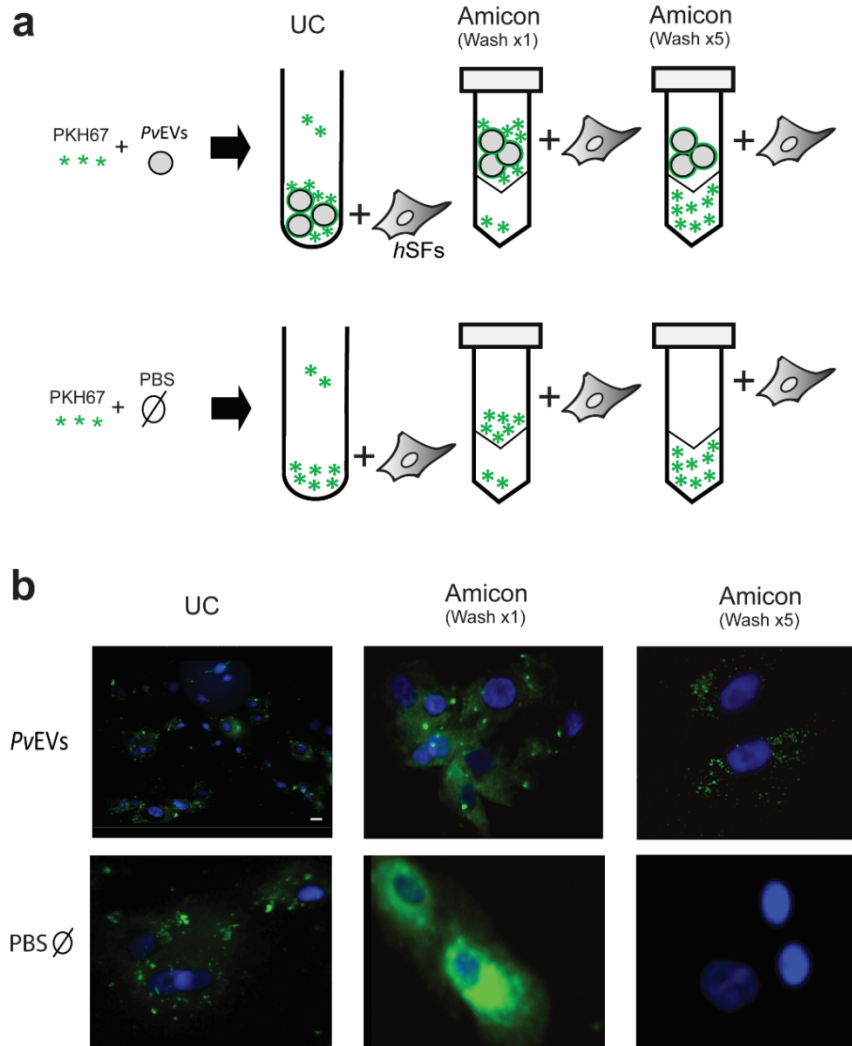

**Supplementary Figure 4. EVs-staining and washing methods for confocal microscopy analysis.**

**(a) Removal of excess dye.** Pooled PvEVs or equal amount of PBS were stained with PKH67 (green). In order to remove the excess dye, stained EVs and stained PBS were washed by three different methods: 2 times washed by ultracentrifugation (UC), 1 time washed by Amicon 100kD cutoff filters, and 5 times washed by Amicon 100-kDa cutoff filters. EVs and PBS were incubated with hSFs at 37°C for 2 h. Small green stars show unbounded PKH67 dyes, and gray circle encircled by green line show PKH67-stained EVs. **(b) Confocal images of the different washing methods.** hSFs incubated with PKH67-stained EVs or PBS washed by three different methods. Nucleus were stained with Hoechst® 33342 (blue). Scale bar: 10µm. Image representative of three independent experiments.

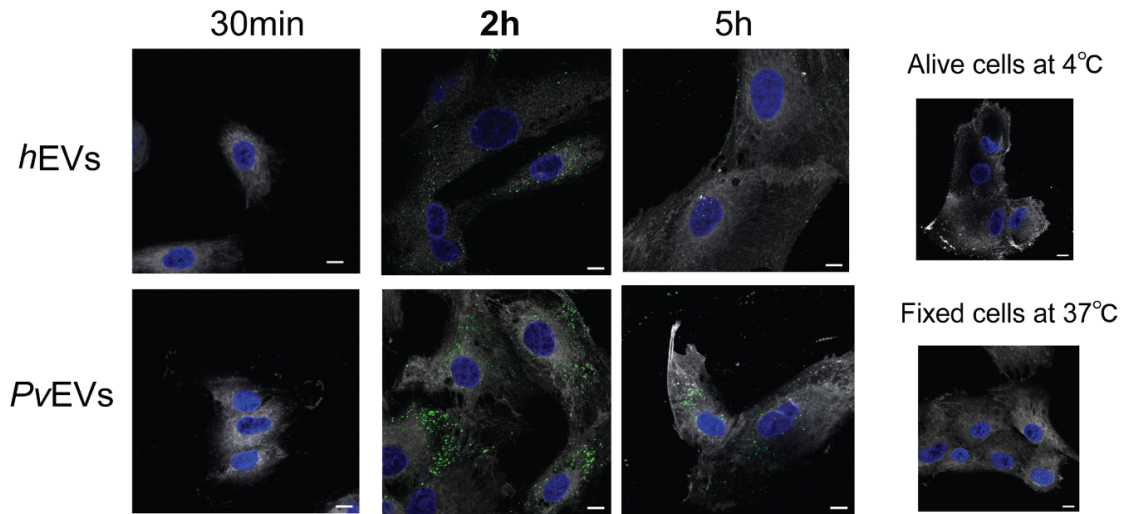

**Supplementary Figure 5. Uptake of EVs by *hSFs*.** **Left panel.** Confocal images of the uptake time course of PKH67-stained pooled *PvEVs* (green) and *hEVs* (green) individually incubated with *hSFs* at 37°C. **Right panel.** Confocal images of controls, PKH67-stained pooled *PvEVs* incubated with *hSFs* at 4°C or with fixed *hSFs* at 37°C for 2 h. Nucleus were stained with Hoechst® 33342 (blue) and cell membrane were stained with Cell Mask™ (white). Scale bar: 10µm. Image representative of three independent experiments.

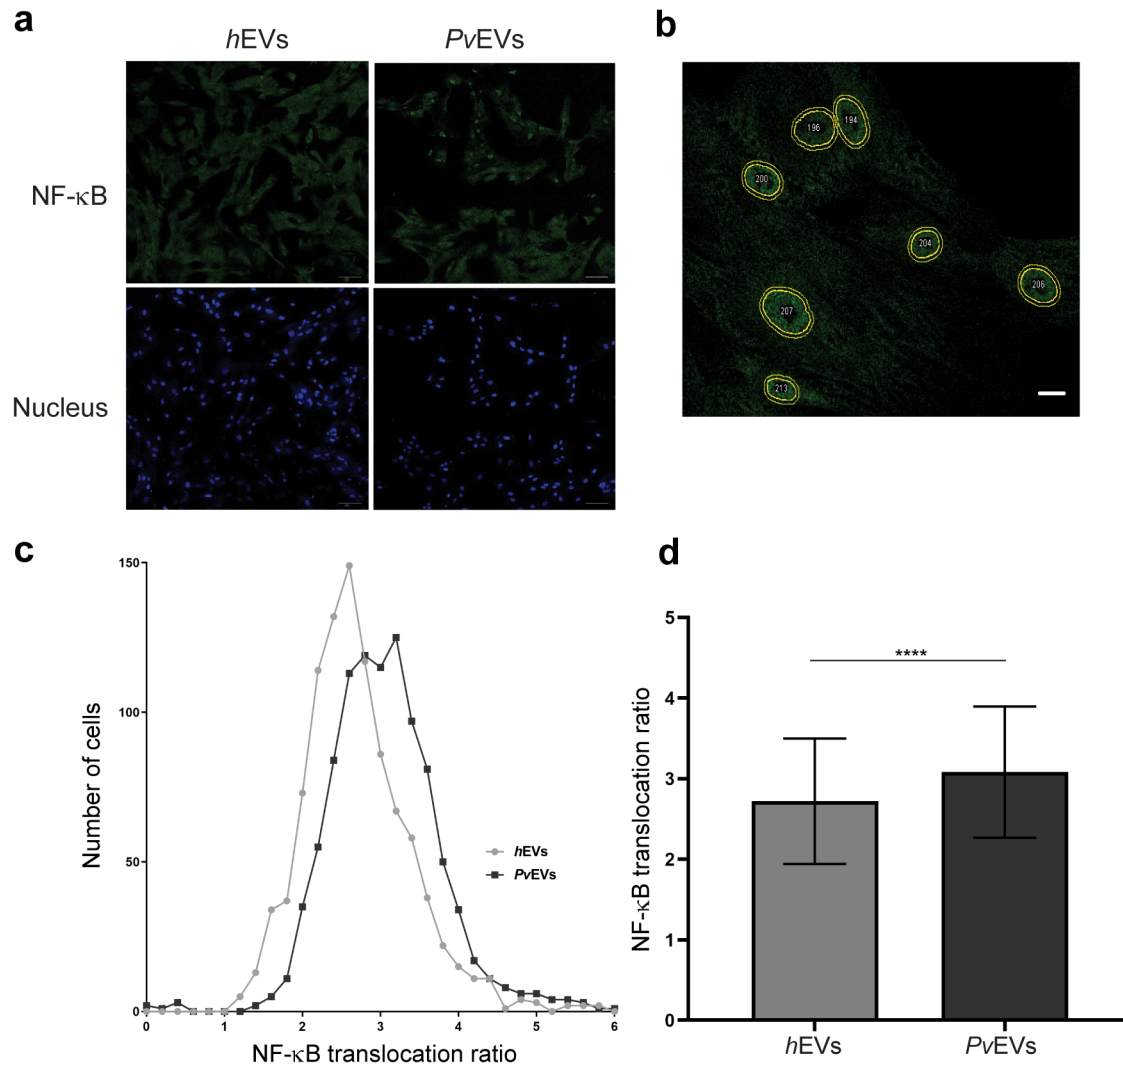

**Supplementary Figure 6. Quantification of NF- $\kappa$ B translocation (a) Confocal images of *hSFs*.** *hSFs* were incubated with pooled *PvEVs* or *hEVs* for 30 min. Nuclear translocation was determined by nucleus staining (blue) and NF- $\kappa$ B staining (green) (x40oil, 5x5 tiled image). Scale bar: 100  $\mu$ m. Image representative of three independent experiments. **(b) Nuclear and perinuclear regions.** Image example to define nuclear and perinuclear regions of individual cells (yellow) determined by Macro. Scale bar: 10  $\mu$ m. Image representative of three independent experiments. **(c) NF- $\kappa$ B translocation ratio** ( $\text{intD}_{\text{Nuclear}}/\text{intD}_{\text{Perinuclear}}$ ) for each cell ( $n = 1000$ ) indicating normal distribution. **(d) Quantification of the NF- $\kappa$ B translocation ratio.** Data show mean  $\pm$  SD ( $n = 1000$ ). Unpaired and two-sided, *t*-test, \*\*\*\* $p < 0.0001$  (GraphPad). Source data are provided as a Source Data file.

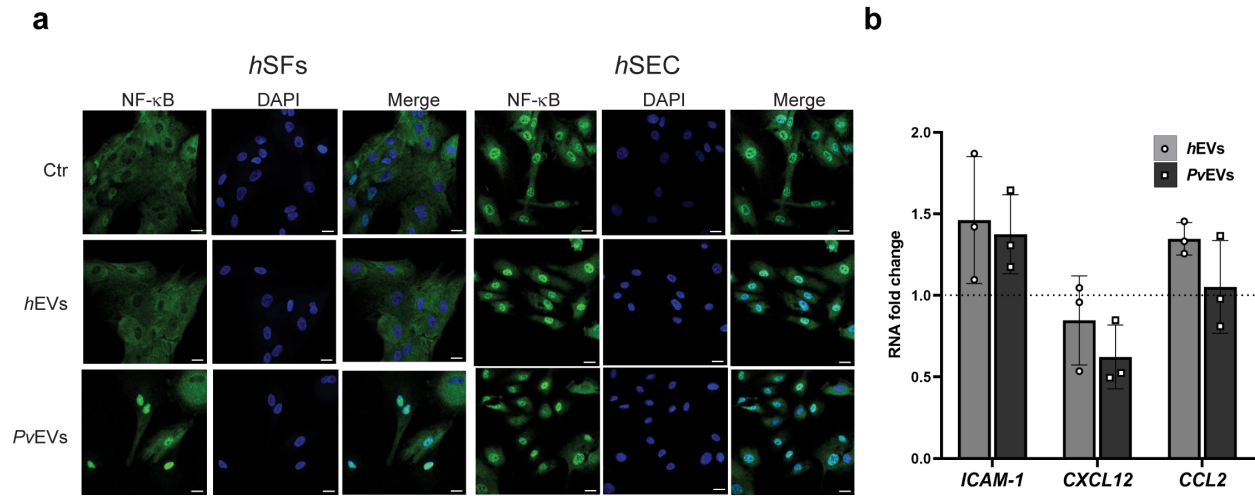

**Supplementary Figure 7. NF- $\kappa$ B nuclear translocation and *ICAM-1* expression in human spleen endothelial cells (*hSEC*).** (a) **Nuclear translocation.** Human spleen fibroblasts (*hSFs*) or human spleen endothelial cells (*hSEC*) were incubated with media alone (Ctr) or with pooled *PvEVs* or *hEVs* for 30 min. Nuclear translocation was determined by nucleus staining (blue) and NF- $\kappa$ B staining (green). Scale bar: 20  $\mu$ m. Image representative of two independent experiments. (b) ***ICAM-1* expression.** Quantitative RT-PCR was performed to analyze the expression of *ICAM-1*, *CXCL12*, and *CCL2* in *hSEC*. *GNB2L1* was used as endogenous control. All data show means of the fold-change relative to control values  $\pm$  SD (technical replicates,  $n = 3$ ). Unpaired and two-sided, t-test. No significant value was observed in any genes (GraphPad). Source data are provided as a Source Data file.



**PvEVs 24h (Isolate1)**

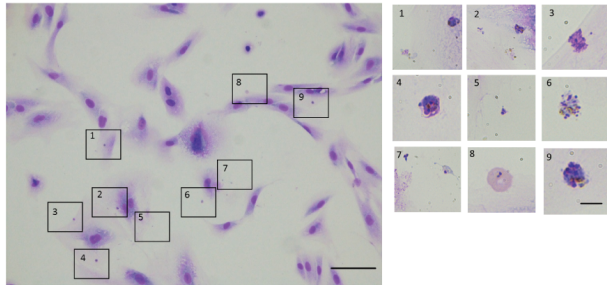

**PvEVs2 24h (Isolate1)**

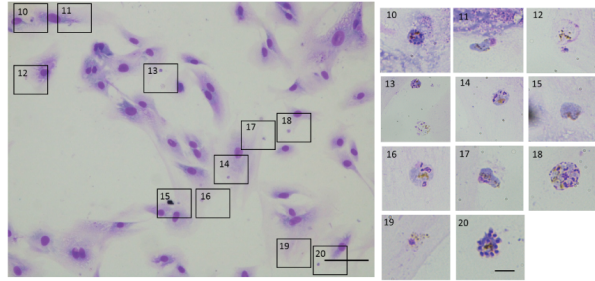

**PvEVs 48h (Isolate2)**

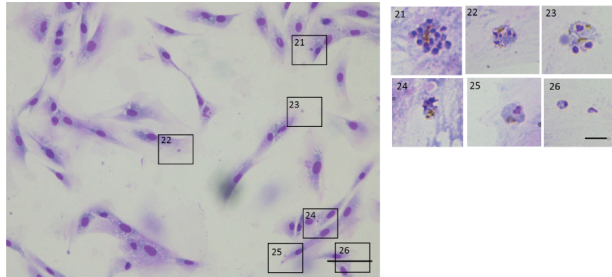

**PvEVs2 48h (Isolate2)**

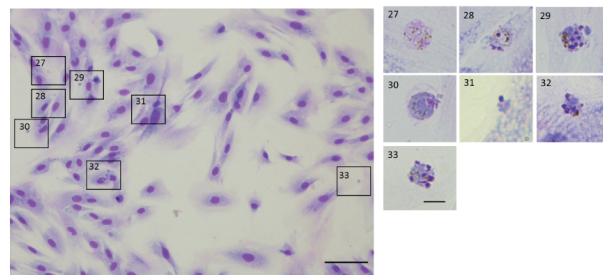

**Supplementary Figure 8. *P. vivax*-infected reticulocytes binding to *hSFs*.** *hSFs* were pre-treated with pooled *PvEVs* or *PvEVs2* for 24 h or 48 h and incubated with two different isolates (1 or 2) for 45 min ( $n = 4$  - *PvEVs*). Phase contrast images of Giemsa-staining *hSFs* were captured by optical microscopy. Left: x20/0.40. Scale bar: 50  $\mu\text{m}$ . Right (1-33): x100/1.25 oil. Scale bar: 5  $\mu\text{m}$ . Images (right) are the zoom of each square in images (left). Each image represents each independent experiment as indicated.

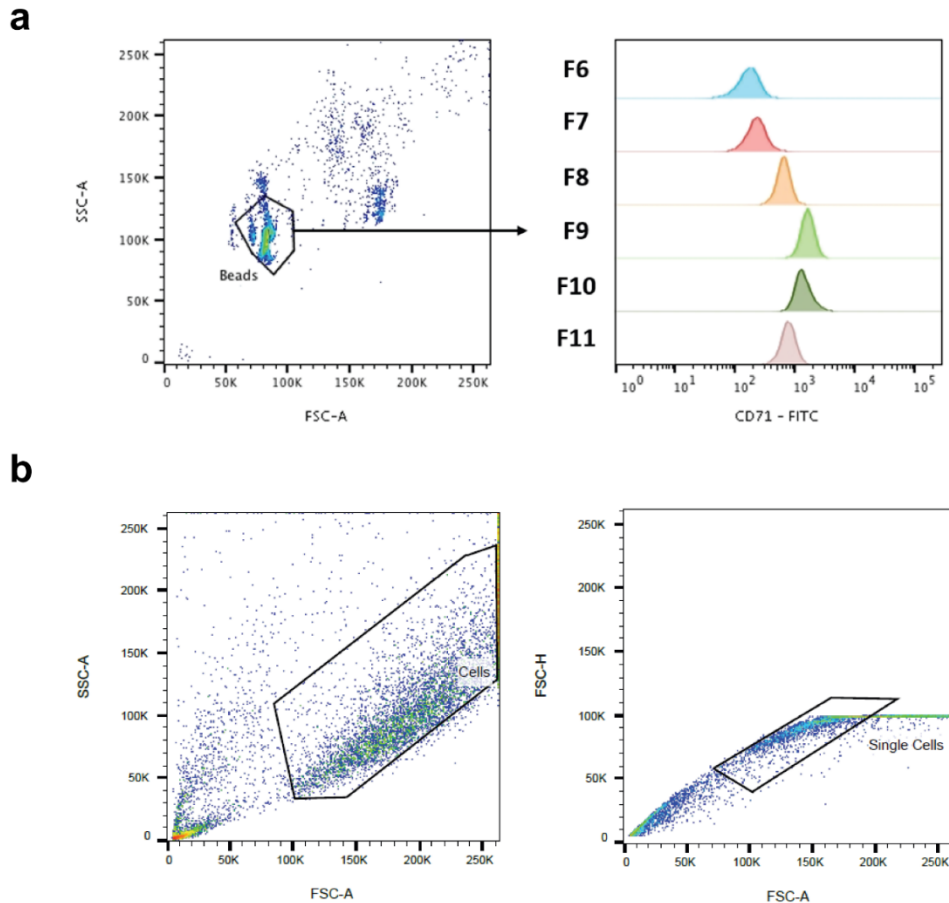

**Supplementary Figure 9. Gating strategy of FACS analysis.** Flow cytometry data showed in pseudocolor plots, with blue and green corresponding to areas of lower particle density, yellow representing mid-range density, and red and orange are areas of high particle density. K, thousands. In total, 10.000 events/sample were analyzed. **(a) Gating strategy for bead-based flow cytometry analysis.** EV-coupled beads were first gated according to FSC-A/SSC-A. Expression of markers (e.g. CD71) was compared among different fractions using the median of FITC of the beads population **(b) Gating strategy for FACS analysis.** The population of cells was selected by FSC-A/SSC-A and cell debris and dead cells were excluded. Afterwards, singlets were selected by FSC-A/FSC-H. For *h*SFs characterization, compare the positivity of interest markers with unstained cells using histogram (corresponding fluorescence/count). For ICAM-1 expression, median of B530-A subset (correspond to Alexa Fluor 488) was used for the quantification.

| <b>Gene Name</b> | <b>Assay ID</b> |
|------------------|-----------------|
| <i>GNB2L1</i>    | Hs00272002_m1   |
| <i>ACTA2</i>     | Hs00426835_g1   |
| <i>GM-CSF</i>    | Hs00929873_m1   |
| <i>VEGFa</i>     | Hs00900055_m1   |
| <i>CXCL12</i>    | Hs00171022_m1   |
| <i>FBG8</i>      | Hs00171832_m1   |
| <i>ICAM-1</i>    | Hs00164932_m1   |
| <i>IL-6</i>      | Hs00985639_m1   |
| <i>IL-10</i>     | Hs00961622_m1   |
| <i>CCL2</i>      | Hs00234140_m1   |
| <i>TLR4</i>      | Hs00152939_m1   |
| <i>TRL7</i>      | Hs00152971_m1   |
| <i>TRL9</i>      | HS00152973_m1   |

**Supplementary Table 1. List of the gene names and corresponding Assay ID used for qRT-PCR analysis.** Assay ID is according to TaqMan® Gene Expression Assays (Thermo Fisher Scientific). Sequences of the primers are not available from the company.
